# Supplementary material for: A Free Web-Based Protocol to Assist Structure-Based Virtual Screening Experiments
Source: MDPI journal article supplement (doi:10.3390/ijms20184648), 2019-09-19
Supplement: s1 [file s1]

## Supplementary Materials:

Table 1. Main steps of the proposed web-based virtual screening protocol. The docking/scoring phase was applied to 4574 approved drugs. The calculation time is averaged from the screening of the three cancer protein targets, CDK2, GP130 and cereblon, investigated here.

| Step | Webserver                                                                                                                | Input                                                                                                                                   | Output                                                                                       | Calculation Time   | Link to Web Server and Userguide                                                                                                                  | Ref |
|------|--------------------------------------------------------------------------------------------------------------------------|-----------------------------------------------------------------------------------------------------------------------------------------|----------------------------------------------------------------------------------------------|--------------------|---------------------------------------------------------------------------------------------------------------------------------------------------|-----|
| 1    | <b>FAF-Drugs4</b><br>Filtering of chemical library according to physicochemical properties and toxic/PAINS groups        | Merging 8394 drug structures from:<br>1) ChEMBL “drug”<br>2) DrugBank “approved”<br>3) Drug Central<br>4) SuperDrug2 “approved”         | Drugs-lib available at MTiOpenScreen: 7173 stereoisomer drugs (4574 single isomer molecules) | 25 min             | <a href="http://fafdrugs4.mti.univ-paris-diderot.fr/mobyle.html">http://fafdrugs4.mti.univ-paris-diderot.fr/mobyle.html</a>                       | 19  |
| 2    | <b>MTiOpenScreen</b><br>Screening Drugs-lib with Vina docking against 3 cancer protein targets                           | -protein MOL2 file prepared with Chimera<br>-Drugs-lib library containing 7173 stereoisomer drugs                                       | Top ranked 1500 ligands (with 3 best scored poses per ligand)                                | 1 h 30 per protein | <a href="http://bioserv.rpbs.univ-paris-diderot.fr/services/MTiOpenScreen/">http://bioserv.rpbs.univ-paris-diderot.fr/services/MTiOpenScreen/</a> | 20  |
| 3A   | <b>AMMOS2</b><br>Minimization<br>Refinement:<br>Full protein flexibility:<br>Case 1                                      | -protein PDB file prepared with Chimera <sup>#</sup><br>-top ranked 1000 ligand poses generated in Step 2                               | 1000 minimized ligand poses ranked by binding energy                                         | 8 min per protein  | <a href="http://drugmod.rpbs.univ-paris-diderot.fr/amosHome.php">http://drugmod.rpbs.univ-paris-diderot.fr/amosHome.php</a>                       | 21  |
| 3B   | <b>AMMOS2</b> Minimization<br>Refinement:<br>Protein flexibility:<br>Case 3, all protein atoms within 6 Å of ligand      | -protein PDB file prepared with Chimera <sup>#</sup><br>-4500 ligand poses generated in Step 2 (1500 top ranked ligands x 3 best poses) | 4500 minimized ligand poses ranked by binding energy                                         | 45 min per protein | <a href="http://drugmod.rpbs.univ-paris-diderot.fr/amosHome.php">http://drugmod.rpbs.univ-paris-diderot.fr/amosHome.php</a>                       | 21  |
| 3C   | <b>AMMOS2</b> Minimization<br>Refinement:<br>Protein flexibility<br>Case 4, protein sidechain atoms within 6 Å of ligand | -protein PDB file prepared with Chimera <sup>#</sup><br>-4500 ligand poses generated in Step 2 (1500 top ranked ligands x 3 best poses) | 4500 minimized ligand poses ranked by binding energy                                         | 45 min per protein | <a href="http://drugmod.rpbs.univ-paris-diderot.fr/amosHome.php">http://drugmod.rpbs.univ-paris-diderot.fr/amosHome.php</a>                       | 21  |

<sup>#</sup> The protein receptor preparation can be achieved using a two-step protocol with the user-friendly visualization tool Chimera, which is a free to academic and nonprofit users. All details on the Chimera’s two-step protocol can be found in the Supplementary Information of Ref. 42.
